# Supplementary material for: Anti-fibrotic, anti-VEGF or radiotherapy treatments as adjuvants for pterygium excision: a systematic review and network meta-analysis
Source: Springer Nature journal article supplement (doi:10.1186/s12886-017-0601-5), 2017-11-24
Supplement: MOESM2 [file 15253990]

A

### Bevacizumab for pterygium excision

Patient or population: patients with pterygium excision

Settings:

Intervention: Bevacizumab

| Outcomes   | Illustrative comparative risks* (95% CI) |                                   | Relative effect (95% CI)  | No of Participants (studies) | Quality of the evidence (GRADE) | Comments |
|------------|------------------------------------------|-----------------------------------|---------------------------|------------------------------|---------------------------------|----------|
|            | Assumed risk<br>Control                  | Corresponding risk<br>Bevacizumab |                           |                              |                                 |          |
| Recurrence | Study population                         |                                   | OR 0.45<br>(0.25 to 0.83) | 624<br>(10 studies)          | ⊕⊕⊕⊕<br>low <sup>1,2,3</sup>    |          |
|            | 231 per 1000                             | 119 per 1000<br>(70 to 199)       |                           |                              |                                 |          |
|            | Moderate                                 |                                   |                           |                              |                                 |          |
|            | 133 per 1000                             | 65 per 1000<br>(37 to 113)        |                           |                              |                                 |          |

\*The basis for the assumed risk (e.g. the median control group risk across studies) is provided in footnotes. The corresponding risk (and its 95% confidence interval) is based on the assumed risk in the comparison group and the relative effect of the intervention (and its 95% CI).

CI: Confidence interval; OR: Odds ratio.

GRADE Working Group grades of evidence

**High quality:** Further research is very unlikely to change our confidence in the estimate of effect.

**Moderate quality:** Further research is likely to have an important impact on our confidence in the estimate of effect and may change the estimate.

**Low quality:** Further research is very likely to have an important impact on our confidence in the estimate of effect and is likely to change the estimate.

**Very low quality:** We are very uncertain about the estimate.

<sup>1</sup> Heterogeneity: Tau<sup>2</sup> = 0.31; Chi<sup>2</sup> = 14.58, df = 10 (P = 0.15); I<sup>2</sup> = 31%

<sup>2</sup> Event=108, less than 300

<sup>3</sup> Studies lacked details about allocation concealment and blinding

B

### MMC for pterygium excision

Patient or population: patients with pterygium excision

Settings:

Intervention: MMC

| Outcomes   | Illustrative comparative risks* (95% CI) |                            | Relative effect (95% CI)  | No of Participants (studies) | Quality of the evidence (GRADE) | Comments |
|------------|------------------------------------------|----------------------------|---------------------------|------------------------------|---------------------------------|----------|
|            | Assumed risk<br>Control                  | Corresponding risk<br>MMC  |                           |                              |                                 |          |
| Recurrence | Study population                         |                            | OR 0.15<br>(0.07 to 0.31) | 1127<br>(15 studies)         | ⊕⊕⊕⊕<br>low <sup>1,2,3</sup>    |          |
|            | 396 per 1000                             | 89 per 1000<br>(44 to 169) |                           |                              |                                 |          |
|            | Moderate                                 |                            |                           |                              |                                 |          |
|            | 389 per 1000                             | 87 per 1000<br>(43 to 165) |                           |                              |                                 |          |

\*The basis for the assumed risk (e.g. the median control group risk across studies) is provided in footnotes. The corresponding risk (and its 95% confidence interval) is based on the assumed risk in the comparison group and the relative effect of the intervention (and its 95% CI).

CI: Confidence interval; OR: Odds ratio.

GRADE Working Group grades of evidence

**High quality:** Further research is very unlikely to change our confidence in the estimate of effect.

**Moderate quality:** Further research is likely to have an important impact on our confidence in the estimate of effect and may change the estimate.

**Low quality:** Further research is very likely to have an important impact on our confidence in the estimate of effect and is likely to change the estimate.

**Very low quality:** We are very uncertain about the estimate.

<sup>1</sup> Heterogeneity: Tau<sup>2</sup> = 1.36; Chi<sup>2</sup> = 46.79, df = 14 (P < 0.0001); I<sup>2</sup> = 70%

<sup>2</sup> Studies lacked details about allocation concealment and blinding

<sup>3</sup> Event=230, less than 300

C

### 5-FU for pterygium excision

Patient or population: patients with pterygium excision

Settings:

Intervention: 5-FU

| Outcomes   | Illustrative comparative risks* (95% CI) |                             | Relative effect (95% CI) | No of Participants (studies) | Quality of the evidence (GRADE)     | Comments |
|------------|------------------------------------------|-----------------------------|--------------------------|------------------------------|-------------------------------------|----------|
|            | Assumed risk<br>Control                  | Corresponding risk<br>5-FU  |                          |                              |                                     |          |
| recurrence | Study population                         |                             | OR 0.77<br>(0.07 to 8.7) | 280<br>(2 studies)           | ⊕⊕⊕⊕<br>very low <sup>1,2,3,4</sup> |          |
|            | 229 per 1000                             | 186 per 1000<br>(20 to 720) |                          |                              |                                     |          |
|            | Moderate                                 |                             |                          |                              |                                     |          |
|            | 279 per 1000                             | 230 per 1000<br>(26 to 771) |                          |                              |                                     |          |

\*The basis for the assumed risk (e.g. the median control group risk across studies) is provided in footnotes. The corresponding risk (and its 95% confidence interval) is based on the assumed risk in the comparison group and the relative effect of the intervention (and its 95% CI).

CI: Confidence interval; OR: Odds ratio.

GRADE Working Group grades of evidence

**High quality:** Further research is very unlikely to change our confidence in the estimate of effect.

**Moderate quality:** Further research is likely to have an important impact on our confidence in the estimate of effect and may change the estimate.

**Low quality:** Further research is very likely to have an important impact on our confidence in the estimate of effect and is likely to change the estimate.

**Very low quality:** We are very uncertain about the estimate.

<sup>1</sup> Studies lacked details about allocation concealment and blinding

<sup>2</sup> Event=51, less than 300

<sup>3</sup> Heterogeneity: Tau<sup>2</sup> = 2.74; Chi<sup>2</sup> = 9.69, df = 1 (P = 0.002); I<sup>2</sup> = 90%

<sup>4</sup> OR (95%CI): 0.77 [0.07, 8.70]

D

### β-RT for pterygium excision

Patient or population: patients with pterygium excision

Settings:

Intervention: β-RT

| Outcomes   | Illustrative comparative risks* (95% CI) |                             | Relative effect (95% CI)  | No of Participants (studies) | Quality of the evidence (GRADE)   | Comments |
|------------|------------------------------------------|-----------------------------|---------------------------|------------------------------|-----------------------------------|----------|
|            | Assumed risk<br>Control                  | Corresponding risk<br>β-RT  |                           |                              |                                   |          |
| recurrence | Study population                         |                             | OR 8.12<br>(0.01 to 1.03) | 194<br>(2 studies)           | ⊕⊕⊕⊕<br>very low <sup>1,2,3</sup> |          |
|            | 458 per 1000                             | 92 per 1000<br>(8 to 486)   |                           |                              |                                   |          |
|            | Moderate                                 |                             |                           |                              |                                   |          |
|            | 492 per 1000                             | 104 per 1000<br>(10 to 499) |                           |                              |                                   |          |

\*The basis for the assumed risk (e.g. the median control group risk across studies) is provided in footnotes. The corresponding risk (and its 95% confidence interval) is based on the assumed risk in the comparison group and the relative effect of the intervention (and its 95% CI).

CI: Confidence interval; OR: Odds ratio.

GRADE Working Group grades of evidence

**High quality:** Further research is very unlikely to change our confidence in the estimate of effect.

**Moderate quality:** Further research is likely to have an important impact on our confidence in the estimate of effect and may change the estimate.

**Low quality:** Further research is very likely to have an important impact on our confidence in the estimate of effect and is likely to change the estimate.

**Very low quality:** We are very uncertain about the estimate.

<sup>1</sup> Studies lacked details about allocation concealment and blinding

<sup>2</sup> Heterogeneity: Tau<sup>2</sup> = 2.05; Chi<sup>2</sup> = 6.99, df = 1 (P = 0.008); I<sup>2</sup> = 86%

<sup>3</sup> Event=54, less than 300
