# Supplementary material for: Anti-fibrotic, anti-VEGF or radiotherapy treatments as adjuvants for pterygium excision: a systematic review and network meta-analysis
Source: Springer Nature journal article supplement (doi:10.1186/s12886-017-0601-5), 2017-11-24

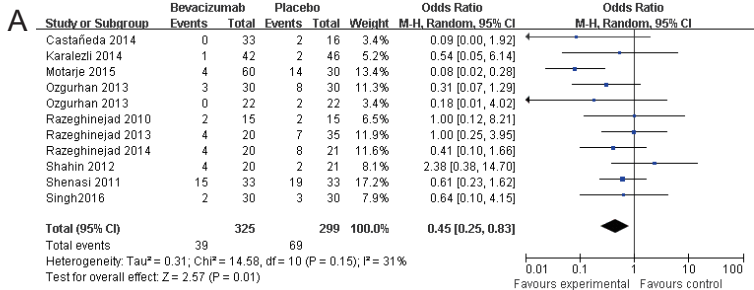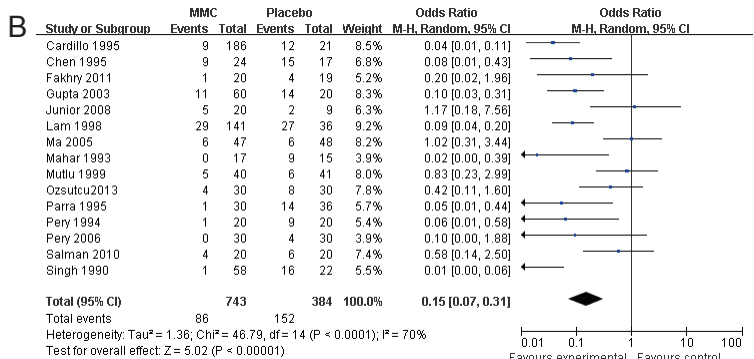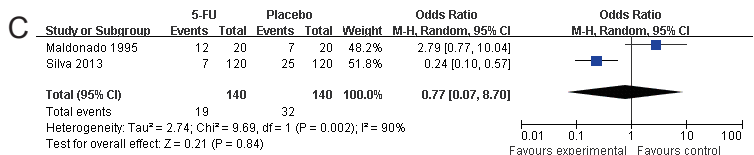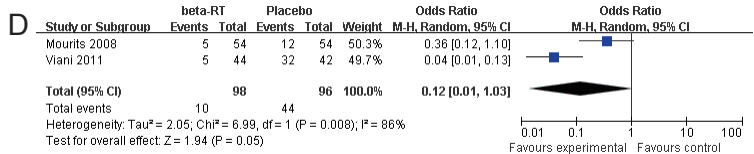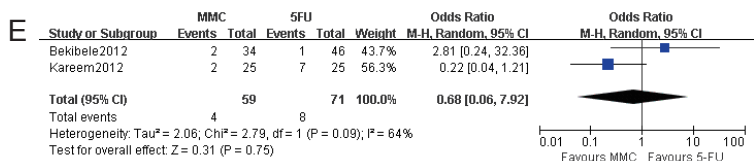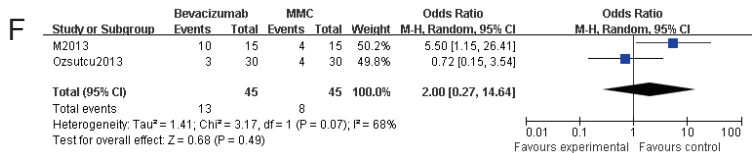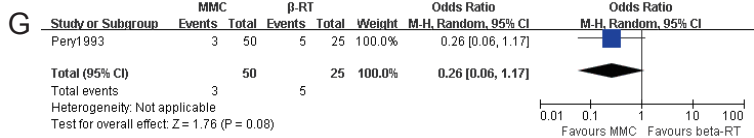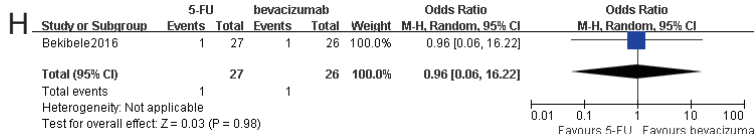

Supplement: MOESM3 [file 15253990]
